# Supplementary material for: Healing of skin wounds using a new cocoon scaffold loaded with platelet-rich or platelet-poor plasma
Source: Royal Society of Chemistry journal article supplement (doi:10.1039/c6ra27021b), 2017-01-01
Supplement: c6ra27021b1.pdf [file c6ra27021b1.pdf]

**Healing of skin wounds using a new cocoon scaffold loaded with platelet-rich or  
platelet-poor plasma**

*Jiawei Liu<sup>a,1</sup>, Fei Lu<sup>a,b,1</sup>, HongLei Chen<sup>a</sup>, Bao Rong<sup>c</sup>, Zhiquan Li<sup>c</sup>, Bitao Lu<sup>a</sup>, Kun  
Yu<sup>a</sup>, Fangying Dai<sup>a,b</sup>, Dayang Wu, Guangqian Lan<sup>a,b</sup>\**

*<sup>a</sup> College of Textile and Garments, Southwest University, Chongqing 400715, China*

*<sup>b</sup> Chongqing Engineering Research Center of Biomaterial Fiber and Modern Textile,  
Chongqing 400715, China*

*<sup>c</sup> The Ninth People's Hospital of Chongqing, Chongqing 400715, China*

Corresponding author at: College of Textile and Garments, Southwest University, Chongqing  
400715, China

E-mail: 30353930@qq.com

Telephone: +0086 13594005200

---

□ Corresponding author at: College of Textile and Garments, Southwest University, Chongqing 400715, China  
*E-mail: 30353930@qq.com*

1 These authors contributed equally to this work.

## Supporting Information

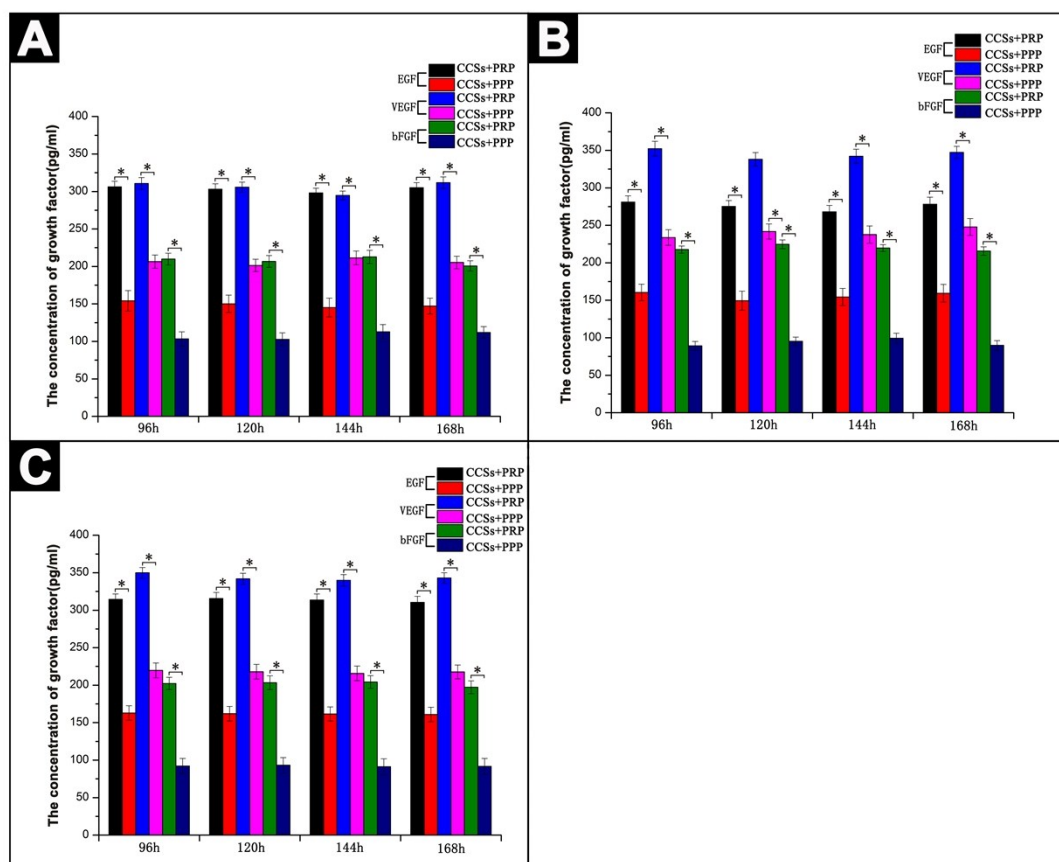

**Figure S1.** Release rates of growth factors from CCSs+PRP and CCSs+PPP in (A) NS, (B) PBS, and (C) SBF. The concentrations of growth factors in soaking liquid were measured at 96, 120, 144, and 168 h.  $*P < 0.05$ ,  $n = 5$ .

As the immersion time increased from 72 to 144 h (**Figure S1A**), the amount of EGF in the CCSs+PRP no longer increased, VEGF and bFGF showed similar trends, and similar trends were observed in PBS (**Figure S1B**) and SBF (**Figure S1C**).

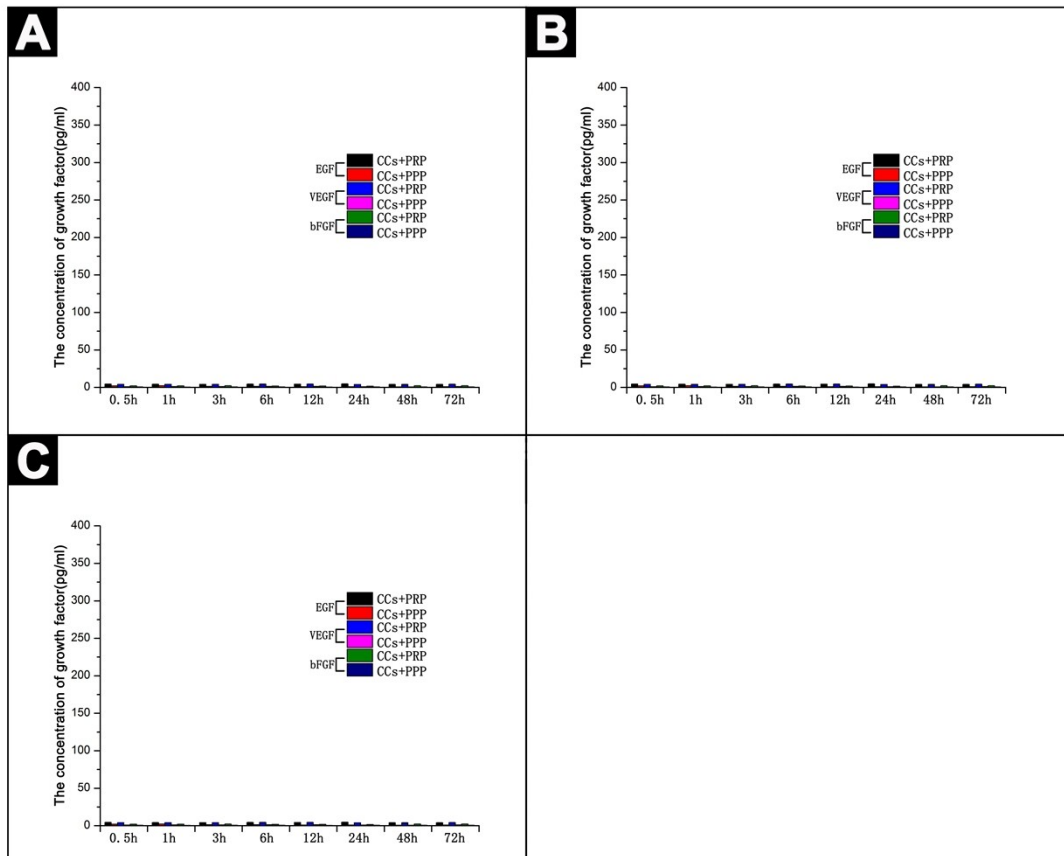

**Figure S2** Release rates of growth factors from CCs+PRP and CCs+PPP in (A) NS, (B) PBS, and (C) SBF. The concentrations of growth factors in soaking liquid were measured at 0.5, 1, 3, 6, 12, 24, 48, and 72 h. \* $P < 0.05$ ,  $n = 5$ .

The growth factors almost could not be detected from CCs loaded with PRP or PPP, indicating that CCs could not act as storage vehicles for growth factors.
